# Supplementary material
Source: Springer Nature journal article supplement (https://www.springermedizin.de/resource/supplementary/13020_2013_213_MOESM4_ESM.pdf/9641220)

**A**

|  | Frankincense |     |   |   | Sandalwood |   |     |   |   |   |
|--|--------------|-----|---|---|------------|---|-----|---|---|---|
|  | 0            | 0.5 | 1 | 2 | 3          | 0 | 0.5 | 1 | 2 | 3 |

Time after  
treatment (h)

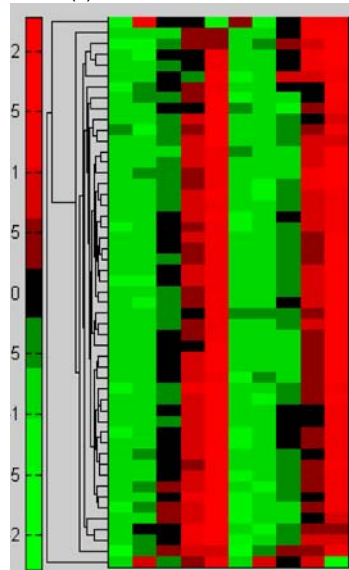**B**

|  | Frankincense |     |   |   | Sandalwood |   |     |   |   |   |
|--|--------------|-----|---|---|------------|---|-----|---|---|---|
|  | 0            | 0.5 | 1 | 2 | 3          | 0 | 0.5 | 1 | 2 | 3 |

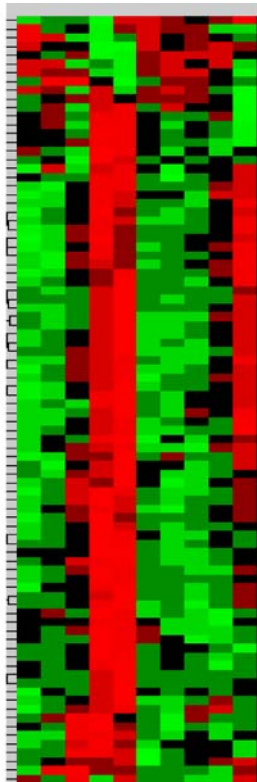**C**

|  | Frankincense |     |   |   | Sandalwood |   |     |   |   |   |
|--|--------------|-----|---|---|------------|---|-----|---|---|---|
|  | 0            | 0.5 | 1 | 2 | 3          | 0 | 0.5 | 1 | 2 | 3 |

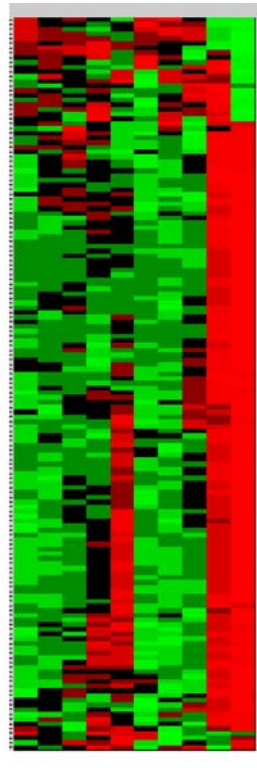

Supplement: MOESM4 [file 9641220]
